# Supplementary material
Source: PubMed Central journal article supplement (PMC9004227)
Supplement: NIHMS1794208-supplement-PMID_34819622_Suppl_Info.pdf [file NIHMS1794208-supplement-PMID_34819622_Suppl_Info.pdf]

---

**Supplementary information**

---

**Radiotherapy as a tool to elicit clinically actionable signalling pathways in cancer**

---

In the format provided by the authors and unedited

**Supplementary Table 1. Current status of DDR inhibitors.**

| <b>Target</b>        | <b>Agent</b> | <b>Status</b>                                                                        | <b>Indications*</b>                                | <b>Notes</b>                                                                                                           | <b>Ref.</b>                                                                                  |
|----------------------|--------------|--------------------------------------------------------------------------------------|----------------------------------------------------|------------------------------------------------------------------------------------------------------------------------|----------------------------------------------------------------------------------------------|
| ATM                  | KU60019      | Preclinical testing                                                                  | N/A                                                | Cooperates with RT to enhance type I IFN signaling in models of pancreatic cancer                                      | 1                                                                                            |
| ATR                  | Berzosertib  | Clinical testing                                                                     | Brain metastases<br>Breast cancer<br>HNSCC         | Well tolerated as monotherapy and in combination with carboplatin or topotecan                                         | 2, 3<br>NCT02567422<br>NCT02589522<br>NCT04052555                                            |
|                      | Ceralasertib | Clinical testing                                                                     | Various solid tumors                               | Safely combined with weekly paclitaxel in melanoma patients, currently being tested in combination with palliative RT  | 4, 5<br>NCT02223923                                                                          |
| CDK1<br>CDK2<br>CDK9 | AZD5438      | Discontinued                                                                         | N/A                                                | Discontinued due to tolerability issues                                                                                | 6                                                                                            |
| CDK4<br>CDK6         | Abemaciclib  | FDA approved for ER <sup>+</sup> HER2 <sup>-</sup> advanced/metastatic breast cancer | Breast cancer<br>Prostate cancer                   | Well tolerated in combination in with RT, with sporadic episodes of high-grade but reversible intestinal toxicity      | 7-9<br>NCT04298983<br>NCT04923542                                                            |
|                      | Palbociclib  | FDA approved for ER <sup>+</sup> HER2 <sup>-</sup> advanced/metastatic breast cancer | Breast cancer<br>HNSCC<br>Nasopharyngeal carcinoma | Well tolerated in combination in with RT, with sporadic episodes of high-grade but reversible intestinal toxicity      | 7-11<br>NCT03024489<br>NCT03691493<br>NCT04334330<br>NCT04563507<br>NCT04605562              |
|                      | Ribociclib   | FDA approved for ER <sup>+</sup> HER2 <sup>-</sup> advanced/metastatic breast cancer | Breast cancer<br>Glioma                            | Well tolerated in combination in with RT and associated to increased necrotic volume in 4 out of 10 patients with DIPG | 7-9, 12, 13<br>NCT03355794                                                                   |
| CHEK1                | Prexasertib  | Clinical testing                                                                     | N/A                                                | Well tolerated in combination with RT and cetuximab (but not cisplatin)                                                | 14                                                                                           |
| CHEK1<br>CHEK2       | AZD7762      | Discontinued                                                                         | N/A                                                | Discontinued due to unpredictable cardiac toxicity                                                                     | 15                                                                                           |
| DNA-PK               | Peposertib   | Clinical testing                                                                     | Various solid tumors                               | Well tolerated as monotherapy, currently being investigated in combination with palliative RT and SOC chemotherapy     | 16<br>NCT02516813<br>NCT03724890<br>NCT03770689<br>NCT04068194<br>NCT04071236<br>NCT04172532 |

|                |             |                                                                                                          |                                                       |                                                                                                                                                                                  |                                                                |
|----------------|-------------|----------------------------------------------------------------------------------------------------------|-------------------------------------------------------|----------------------------------------------------------------------------------------------------------------------------------------------------------------------------------|----------------------------------------------------------------|
|                |             |                                                                                                          |                                                       |                                                                                                                                                                                  | NCT04533750<br>NCT04555577<br>NCT04750954                      |
| PARP1<br>PARP2 | Fluzoparib  | Clinical testing                                                                                         | NSCLC                                                 | Well tolerated in germline <i>BRCA1/2</i> -mutated ovarian cancer patients, currently being investigated in combination with camrelizumab after concurrent RT and chemotherapy   | 17<br>NCT04828395                                              |
|                | Niraparib   | FDA approved for advanced epithelial ovarian, fallopian tube, or primary peritoneal cancer               | Various solid tumors (>10 clinical trials)            | Currently being investigated in combination RT and chemotherapy or immunotherapy, improved RT-induced CD8 <sup>+</sup> T cell activation in a murine model of EGFR-mutated NSCLC | 18<br>www.clinicaltrials.gov                                   |
|                | Olaparib    | FDA approved for ovarian cancer and mCRPC exhibiting <i>BRCA1</i> , <i>BRCA2</i> or <i>ATM</i> mutations | Various solid tumors (>20 clinical trials)            | Well tolerated in combination with RT in patients with locally advanced HNSCC and TNBC                                                                                           | 19-22<br>www.clinicaltrials.gov                                |
|                | Rucaparib   | FDA approved for mCRPC exhibiting <i>BRCA1</i> or <i>BRCA2</i> mutations                                 | TNBC                                                  | Currently being tested in combination with post-operative RT in patients with an incomplete response to neoadjuvant chemotherapy                                                 | NCT03542175                                                    |
|                | Talazoparib | FDA approved for HER2 <sup>-</sup> breast cancer exhibiting <i>BRCA1</i> or <i>BRCA2</i> mutations       | Glioma<br>Gynecological tumors<br>SCLC<br>TNBC        | Currently being tested in combination with RT ± carboplatin or atezolimumab                                                                                                      | NCT03968406<br>NCT04170946<br>NCT04690855<br>NCT04740190       |
| WEE1           | Adavosertib | Clinical testing                                                                                         | GBM<br>GE carcinoma<br>Glioma<br>Gynecological tumors | Well tolerated in combination with RT and gemcitabine in patients with locally advanced pancreatic cancer                                                                        | 23<br>NCT01849146<br>NCT01922076<br>NCT03345784<br>NCT04460937 |

**Abbreviations:** DDR, DNA damage response; DIPG, diffuse intrinsic pontine glioma; ER, estrogen receptor; FDA, food and drug administration; GBM, glioblastoma; GE, gastroesophageal; HNSCC, head and neck squamous cell carcinoma; IFN, interferon; mCRPC, metastatic castration-resistant prostate cancer; N/A, not applicable; OS, overall survival; RT, radiation therapy; SCLC, small cell lung cancer; SOC, standard-of-care; TNBC, triple negative breast cancer. \*in the context of RT.

**Supplementary Table 2. Current status of RTK and PI3K signaling inhibitors.**

| Target                                                      | Agent       | Status                                                               | Indications*                               | Notes                                                                                                                                                 | Ref.                                                                                                                       |
|-------------------------------------------------------------|-------------|----------------------------------------------------------------------|--------------------------------------------|-------------------------------------------------------------------------------------------------------------------------------------------------------|----------------------------------------------------------------------------------------------------------------------------|
| AKT1                                                        | MK-2206     | Clinical testing                                                     | N/A                                        | Fails to improve the therapeutic activity of RT in GBM cells owing to aberrant MTOR activation                                                        | 24                                                                                                                         |
| EGFR                                                        | AG1478      | Preclinical testing                                                  | GBM                                        | Increased the radiosensitivity of human GBM cells                                                                                                     | 25                                                                                                                         |
|                                                             | Cetuximab   | FDA approved for EGFR <sup>+</sup> mCRC and HNSCC                    | Various solid tumors (>40 clinical trials) | Associated with improved locoregional control and OS (but also severe dermatitis) in patients with HNSCC receiving definitive RT                      | 26-28<br>www.clinicaltrials.gov                                                                                            |
|                                                             | Erlotinib   | FDA approved for EGFR-mutated metastatic NSCLC                       | NSCLC<br>Pancreatic cancer                 | Associated with increased response rates to whole-brain RT in NSCLC patients with brain metastases                                                    | 29<br>NCT00708448<br>NCT01013649<br>NCT02045446<br>NCT02714010<br>NCT02788058<br>NCT03119519<br>NCT03137771<br>NCT04193007 |
|                                                             | Gefitinib   | FDA approved for EGFR-mutated metastatic NSCLC                       | NSCLC                                      | Associated with increased response rates to whole-brain RT in NSCLC patients with brain metastases                                                    | 29 NCT02714010<br>NCT02788058<br>NCT03119519<br>NCT03381430<br>NCT04193007                                                 |
|                                                             | Nimotuzumab | Clinical testing                                                     | Various solid tumors (>10 clinical trials) | Well tolerated in combination with RT and chemotherapy in different settings, and linked to increased survival in patients with EGFR <sup>+</sup> GBM | 30-32<br>www.clinicaltrials.gov                                                                                            |
| EGFR<br>HER2                                                | Lapatinib   | FDA approved for advanced/metastatic HER2 <sup>+</sup> breast cancer | Breast cancer<br>GBM<br>HNSCC              | Well tolerated in combination with RT and associated to improved local control and OS in breast cancer (but not HNSCC) patients with brain metastases | 33-35<br>NCT01591577<br>NCT01711658<br>NCT01622868<br>NCT01612351                                                          |
| FGFR1<br>FGFR2<br>FGFR3<br>FGFR4<br>IGF1R<br>MARK<br>VEGFR2 | AZD4547     | Clinical testing                                                     | N/A                                        | Sensitizes NSCLC and glioma cell lines to RT, <i>in vitro</i> and <i>in vivo</i>                                                                      | 36, 37                                                                                                                     |

|                                                                         |             |                                                                                                                         |                                            |                                                                                                                                                                                                                                     |                                                    |
|-------------------------------------------------------------------------|-------------|-------------------------------------------------------------------------------------------------------------------------|--------------------------------------------|-------------------------------------------------------------------------------------------------------------------------------------------------------------------------------------------------------------------------------------|----------------------------------------------------|
| FGFR1<br>FGFR2<br>FGFR3<br>FGFR4<br>VEGFR2                              | LY2874455   | Clinical testing                                                                                                        | N/A                                        | Sensitizes multiple cancer cell lines to carbon ion RT                                                                                                                                                                              | 38                                                 |
| HER2                                                                    | Trastuzumab | FDA approved for HER2 <sup>+</sup> breast cancer, metastatic GE or gastric adenocarcinoma                               | Various solid tumors (>20 clinical trials) | Sporadically associated with cardiotoxicity when combined with RT, but also linked to improved locoregional control, PFS and OS in patients with HER2 <sup>+</sup> breast cancer                                                    | 39-45<br>www.clinicaltrials.gov                    |
| MET<br>ALK<br>ROS1                                                      | Crizotinib  | FDA approved for ALK <sup>+</sup> systemic ALCL                                                                         | Ganglioneuroblastoma<br>GBM<br>NSCLC       | Sensitizes HNSCC cell lines to RT, <i>in vitro</i> and <i>in vivo</i>                                                                                                                                                               | 46<br>NCT02270034<br>NCT03126916<br>NCT04193007    |
| MET                                                                     | JNJ38877605 | Discontinued                                                                                                            | N/A                                        | Discontinued to excessive renal toxicity                                                                                                                                                                                            | 47                                                 |
|                                                                         | Tepotinib   | Clinical testing                                                                                                        | N/A                                        | Sensitizes NSCLC cell lines to RT, <i>in vitro</i> and <i>in vivo</i>                                                                                                                                                               | 48                                                 |
| MTOR                                                                    | Everolimus  | FDA approved for NETs of lung or GI origin                                                                              | Bronchial NETs<br>Glioma                   | Well tolerated in combination with RT and with chemoradiation in patients with prostate and locally advanced rectal cancer, but associated with treatment-related toxicities when combined with RT and temozolomide in GBM patients | 49-51<br>NCT03352427<br>NCT03355794<br>NCT04665739 |
|                                                                         | Vistusertib | Clinical testing                                                                                                        | Meningioma                                 | Currently being investigated in recurrent meningioma patients after surgery and RT                                                                                                                                                  | NCT03071874                                        |
| MTOR<br>PI3K $\alpha$<br>PI3K $\beta$<br>PI3K $\delta$<br>PI3K $\gamma$ | Apatolisib  | Preclinical testing                                                                                                     | N/A                                        | Sensitizes HNSCC cell lines to RT                                                                                                                                                                                                   | 52                                                 |
| MTOR<br>PI3K $\alpha$<br>PI3K $\beta$<br>PI3K $\delta$<br>PI3K $\gamma$ | Dactolisib  | Discontinued                                                                                                            | N/A                                        | Discontinued owing to excessive gastrointestinal toxicity and limited activity                                                                                                                                                      | 53-55                                              |
| PI3K $\alpha$                                                           | Alpelisib   | FDA approved for advanced or metastatic ER <sup>+</sup> HER2 <sup>-</sup> breast cancer bearing <i>PIK3CA</i> mutations | HNSCC                                      | Well tolerated in combination with RT and cetuximab or cisplatin in patients with advanced HNSCC                                                                                                                                    | 56, 57<br>NCT02282371                              |
|                                                                         | HS-173      | Preclinical testing                                                                                                     | N/A                                        | Sensitizes pancreatic cancer cell lines to RT, <i>in vitro</i> and <i>in vivo</i>                                                                                                                                                   | 58                                                 |

|                                                                 |             |                                       |                                            |                                                                                                                                         |                                                                          |
|-----------------------------------------------------------------|-------------|---------------------------------------|--------------------------------------------|-----------------------------------------------------------------------------------------------------------------------------------------|--------------------------------------------------------------------------|
|                                                                 | LY294002    | Preclinical testing                   | N/A                                        | Sensitizes multiple cancer cell lines to RT                                                                                             | 25, 59, 60                                                               |
|                                                                 | Taselisib   | Clinical testing                      | N/A                                        | Sensitizes HNSCC cell lines to RT, <i>in vitro</i> and <i>in vivo</i>                                                                   | 61                                                                       |
| PI3K $\alpha$<br>PI3K $\delta$                                  | Pictilisib  | Discontinued                          | N/A                                        | Discontinued owing to excessive toxicity and poor clinical activity                                                                     |                                                                          |
| PI3K $\alpha$<br>PI3K $\beta$<br>PI3K $\delta$<br>PI3K $\gamma$ | Buparlisib  | Clinical testing                      | HNSCC                                      | Well tolerated in combination with palliative RT in patients with NSCLC, but not when combined with RT and temozolomide in GBM patients | 62-64<br>NCT02113878                                                     |
| VEGFA                                                           | Bevacizumab | FDA approved for various solid tumors | Various solid tumors (>40 clinical trials) | Associated with improved response rates to RT in patients with recurrent high-grade glioma                                              | 65<br><a href="http://www.clinicaltrials.gov">www.clinicaltrials.gov</a> |
| VEGFR2                                                          | Apatinib    | Clinical testing                      | Various solid tumors (>20 clinical trials) | Well tolerated when combined with RT in metastatic prostate cancer patients                                                             | 66<br><a href="http://www.clinicaltrials.gov">www.clinicaltrials.gov</a> |
| VEGFR1<br>VEGFR2<br>VEGFR3<br>c-Kit                             | Cediranib   | Clinical testing                      | GBM                                        | Associated with improved OS when combined with chemoradiation in GBM patients                                                           | 67, 68<br>NCT01062425                                                    |

**Abbreviations:** ALCL, anaplastic large cell lymphoma; FDA, food and drug administration; GBM, glioblastoma; GE, gastroesophageal; GI, gastrointestinal; HNSCC, head and neck squamous cell carcinoma; mCRC, metastatic colorectal cancer; N/A, not applicable; NET, neuroendocrine tumor; NSCLC, non-small cell lung cancer; OS, overall survival; PFS, progression-free survival; RT, radiation therapy; RTK, receptor tyrosine kinase; TNBC, triple negative breast cancer. \*in the context of RT.

### Supplementary Table 3. Current status of TGF- $\beta$ and autophagy inhibitors.

| Target                  | Agent           | Status              | Indications*                                                  | Notes                                                                                                             | Ref.                                                                    |
|-------------------------|-----------------|---------------------|---------------------------------------------------------------|-------------------------------------------------------------------------------------------------------------------|-------------------------------------------------------------------------|
| TGFB1<br>TGFB2<br>TGFB3 | Fresolimumab    | Clinical testing    | Breast cancer<br>NSCLC                                        | Well tolerated in combination with RT, linked to increased OS in patients with metastatic breast cancer           | 69<br>NCT02581787                                                       |
| TGFBR1                  | Galunisertib    | Clinical testing    | Breast cancer<br>Glioma<br>HCC<br>Nasopharyngeal carcinoma    | Well tolerated in combination with chemoradiation and temozolomide in glioma patients, the absence of OS benefits | 70<br>NCT04605562                                                       |
|                         | LY364947        | Preclinical testing | Breast cancer<br>GBM<br>NSCLC                                 | Inhibited DDR coupled to increased radiosensitivity in vitro and potentiated RT-induced tumor control in vivo     | 71, 72                                                                  |
| TGFBR1<br>TGFBR2        | LY2109761       | Preclinical testing | GBM                                                           | Inhibited DDR coupled to increased radiosensitivity in vitro and potentiated RT-induced tumor control in vivo     | 73                                                                      |
| TGFBR2<br>PD-L1         | Bintrafusp alfa | Clinical testing    | Breast cancer<br>ESCC<br>Genitourinary cancer<br>HNSCC<br>ICC | Manageable tolerability as monotherapy                                                                            | NCT03524170<br>NCT04220775<br>NCT04481256<br>NCT04708067<br>NCT04756505 |
| Lysosomal degradation   | CQ              | Clinical testing    | Brain metastases<br>GBM                                       | Linked to severe toxicities when combined at 200 mg/day with RT and temozolomide in GBM patients                  | 74-76<br>NCT02432417<br>NCT04397679                                     |
|                         | HCQ             | Clinical testing    | GBM                                                           | Not linked to OS benefit in GBM patients with combined at 600 mg/day with RT and temozolomide                     | 77<br>NCT01494155                                                       |

**Abbreviations:** CQ, chloroquine; ESCC, esophageal squamous cell carcinoma; GBM, glioblastoma; HCC, hepatocellular carcinoma; HCQ, hydroxychloroquine; HNSCC, head and neck squamous cell carcinoma; ICC, intrahepatic cholangiocarcinoma; N/A, not applicable; NSCLC, non-small cell lung cancer; MTD, maximum tolerated dose; OS, overall survival; RT, radiation therapy. \*in the context of RT.

## References

1. Zhang, Q., *et al.* Inhibition of ATM Increases Interferon Signaling and Sensitizes Pancreatic Cancer to Immune Checkpoint Blockade Therapy. *Cancer Res* **79**, 3940-3951 (2019).
2. Yap, T.A., *et al.* Phase I Trial of First-in-Class ATR Inhibitor M6620 (VX-970) as Monotherapy or in Combination With Carboplatin in Patients With Advanced Solid Tumors. *J Clin Oncol* **38**, 3195-3204 (2020).
3. Thomas, A., *et al.* Phase I Study of ATR Inhibitor M6620 in Combination With Topotecan in Patients With Advanced Solid Tumors. *J Clin Oncol* **36**, 1594-1602 (2018).
4. Dillon, M.T., *et al.* PATRIOT: A phase I study to assess the tolerability, safety and biological effects of a specific ataxia telangiectasia and Rad3-related (ATR) inhibitor (AZD6738) as a single agent and in combination with palliative radiation therapy in patients with solid tumours. *Clin Transl Radiat Oncol* **12**, 16-20 (2018).
5. Kim, S.T., *et al.* Phase I Study of Ceralasertib (AZD6738), a Novel DNA Damage Repair Agent, in Combination with Weekly Paclitaxel in Refractory Cancer. *Clin Cancer Res* **27**, 4700-4709 (2021).
6. Boss, D.S., *et al.* Safety, tolerability, pharmacokinetics and pharmacodynamics of the oral cyclin-dependent kinase inhibitor AZD5438 when administered at intermittent and continuous dosing schedules in patients with advanced solid tumours. *Ann Oncol* **21**, 884-894 (2010).
7. Ratosa, I., *et al.* Cyclin-Dependent Kinase 4/6 Inhibitors Combined With Radiotherapy for Patients With Metastatic Breast Cancer. *Clin Breast Cancer* **20**, 495-502 (2020).



8. Ippolito, E., *et al.* Concurrent radiotherapy with palbociclib or ribociclib for metastatic breast cancer patients: Preliminary assessment of toxicity. *Breast* **46**, 70-74 (2019).
9. Guerini, A.E., *et al.* A single-center retrospective safety analysis of cyclin-dependent kinase 4/6 inhibitors concurrent with radiation therapy in metastatic breast cancer patients. *Sci Rep* **10**, 13589 (2020).
10. Beddok, A., *et al.* Concurrent use of palbociclib and radiation therapy: single-centre experience and review of the literature. *Br J Cancer* **123**, 905-908 (2020).
11. Chowdhary, M., *et al.* Safety and Efficacy of Palbociclib and Radiation Therapy in Patients With Metastatic Breast Cancer: Initial Results of a Novel Combination. *Adv Radiat Oncol* **4**, 453-457 (2019).
12. Meattini, I., Desideri, I., Scotti, V., Simontacchi, G. & Livi, L. Ribociclib plus letrozole and concomitant palliative radiotherapy for metastatic breast cancer. *Breast* **42**, 1-2 (2018).
13. DeWire, M., *et al.* A phase I/II study of ribociclib following radiation therapy in children with newly diagnosed diffuse intrinsic pontine glioma (DIPG). *J Neurooncol* **149**, 511-522 (2020).
14. Yang, E.S., *et al.* A Phase 1b trial of prexasertib in combination with chemoradiation in patients with locally advanced head and neck squamous cell carcinoma. *Radiother Oncol* **157**, 203-209 (2021).
15. Sausville, E., *et al.* Phase I dose-escalation study of AZD7762, a checkpoint kinase inhibitor, in combination with gemcitabine in US patients with advanced solid tumors. *Cancer Chemother Pharmacol* **73**, 539-549 (2014).
16. van Bussel, M.T.J., *et al.* A first-in-man phase 1 study of the DNA-dependent protein kinase inhibitor peposertib (formerly M3814) in patients with advanced solid tumours. *Br J Cancer* **124**, 728-735 (2021).

17. Li, N., *et al.* An Open-label, Multicenter, Single-arm, Phase II Study of Fluzoparib in Patients with Germline BRCA1/2 Mutation and Platinum-sensitive Recurrent Ovarian Cancer. *Clin Cancer Res* **27**, 2452-2458 (2021).
18. Zhang, N., *et al.* PARP inhibitor niraparib as a radiosensitizer promotes antitumor immunity of radiotherapy in EGFR-mutated non-small cell lung cancer. *Clin Transl Oncol* **23**, 1827-1837 (2021).
19. Sonnenblick, A., de Azambuja, E., Azim, H.A., Jr. & Piccart, M. An update on PARP inhibitors--moving to the adjuvant setting. *Nat Rev Clin Oncol* **12**, 27-41 (2015).
20. Karam, S.D., *et al.* Final Report of a Phase I Trial of Olaparib with Cetuximab and Radiation for Heavy Smoker Patients with Locally Advanced Head and Neck Cancer. *Clin Cancer Res* **24**, 4949-4959 (2018).
21. Loap, P., *et al.* Combination of Olaparib and Radiation Therapy for Triple Negative Breast Cancer: Preliminary Results of the RADIOPARP Phase 1 Trial. *Int J Radiat Oncol Biol Phys* **109**, 436-440 (2021).
22. de Haan, R., *et al.* Phase I and Pharmacologic Study of Olaparib in Combination with High-dose Radiotherapy with and without Concurrent Cisplatin for Non-Small Cell Lung Cancer. *Clin Cancer Res* **27**, 1256-1266 (2021).
23. Cuneo, K.C., *et al.* Dose Escalation Trial of the Wee1 Inhibitor Adavosertib (AZD1775) in Combination With Gemcitabine and Radiation for Patients With Locally Advanced Pancreatic Cancer. *J Clin Oncol* **37**, 2643-2650 (2019).
24. Djuzenova, C.S., *et al.* Differential effects of the Akt inhibitor MK-2206 on migration and radiation sensitivity of glioblastoma cells. *BMC Cancer* **19**, 299 (2019).
25. Li, H.F., Kim, J.S. & Waldman, T. Radiation-induced Akt activation modulates radioresistance in human glioblastoma cells. *Radiat Oncol* **4**, 43 (2009).

26. Bonner, J.A., *et al.* Radiotherapy plus cetuximab for squamous-cell carcinoma of the head and neck. *N Engl J Med* **354**, 567-578 (2006).
27. Bonner, J.A., *et al.* Radiotherapy plus cetuximab for locoregionally advanced head and neck cancer: 5-year survival data from a phase 3 randomised trial, and relation between cetuximab-induced rash and survival. *Lancet Oncol* **11**, 21-28 (2010).
28. Bonomo, P., *et al.* Incidence of skin toxicity in squamous cell carcinoma of the head and neck treated with radiotherapy and cetuximab: A systematic review. *Crit Rev Oncol Hematol* **120**, 98-110 (2017).
29. Zheng, M.H., *et al.* Combining Whole-Brain Radiotherapy with Gefitinib/Erlotinib for Brain Metastases from Non-Small-Cell Lung Cancer: A Meta-Analysis. *Biomed Res Int* **2016**, 5807346 (2016).
30. Du, X.J., *et al.* Efficacy and safety of nimotuzumab in addition to radiotherapy and temozolomide for cerebral glioblastoma: a phase II multicenter clinical trial. *J Cancer* **10**, 3214-3223 (2019).
31. Fleischhack, G., *et al.* Nimotuzumab and radiotherapy for treatment of newly diagnosed diffuse intrinsic pontine glioma (DIPG): a phase III clinical study. *J Neurooncol* **143**, 107-113 (2019).
32. Yamamoto, N., *et al.* Phase 2 Study of Nimotuzumab in Combination With Concurrent Chemoradiotherapy in Patients With Locally Advanced Non-Small-Cell Lung Cancer. *Clin Lung Cancer* **22**, 134-141 (2021).
33. Khan, M., Zhao, Z., Arooj, S., Zheng, T. & Liao, G. Lapatinib Plus Local Radiation Therapy for Brain Metastases From HER-2 Positive Breast Cancer Patients and Role of Trastuzumab: A Systematic Review and Meta-Analysis. *Front Oncol* **10**, 576926 (2020).
34. Harrington, K., *et al.* Randomised Phase II study of oral lapatinib combined with chemoradiotherapy in patients with advanced squamous cell carcinoma of the head and neck: rationale for future randomised trials in human papilloma virus-negative disease. *Eur J Cancer* **49**, 1609-1618 (2013).

35. Harrington, K., *et al.* Postoperative Adjuvant Lapatinib and Concurrent Chemoradiotherapy Followed by Maintenance Lapatinib Monotherapy in High-Risk Patients With Resected Squamous Cell Carcinoma of the Head and Neck: A Phase III, Randomized, Double-Blind, Placebo-Controlled Study. *J Clin Oncol* **33**, 4202-4209 (2015).
36. SenthilKumar, G., *et al.* FGFR Inhibition Enhances Sensitivity to Radiation in Non-Small Cell Lung Cancer. *Mol Cancer Ther* **19**, 1255-1265 (2020).
37. Ma, J., *et al.* Inhibition of Nuclear PTEN Tyrosine Phosphorylation Enhances Glioma Radiation Sensitivity through Attenuated DNA Repair. *Cancer Cell* **35**, 504-518.e507 (2019).
38. Darwis, N.D.M., *et al.* FGFR Signaling as a Candidate Therapeutic Target for Cancers Resistant to Carbon Ion Radiotherapy. *Int J Mol Sci* **20**, 4563 (2019).
39. Cao, L., *et al.* Trastuzumab improves locoregional control in HER2-positive breast cancer patients following adjuvant radiotherapy. *Medicine (Baltimore)* **95**, e4230 (2016).
40. Jeon, S.H., *et al.* Effects of trastuzumab on locoregional recurrence in human epidermal growth factor receptor 2-overexpressing breast cancer patients treated with chemotherapy and radiotherapy. *Breast Cancer Res Treat* **172**, 619-626 (2018).
41. Sun, G.Y., *et al.* Trastuzumab Provides a Comparable Prognosis in Patients With HER2-Positive Breast Cancer to Those With HER2-Negative Breast Cancer: Post Hoc Analyses of a Randomized Controlled Trial of Post-Mastectomy Hypofractionated Radiotherapy. *Front Oncol* **10**, 605750 (2020).
42. Abi Jaoude, J., *et al.* De-intensifying Radiation Therapy in HER-2 Positive Breast Cancer: To Boost or Not to Boost? *Int J Radiat Oncol Biol Phys* **108**, 1040-1046 (2020).

43. Chumsri, S., *et al.* Incidence of Late Relapses in Patients With HER2-Positive Breast Cancer Receiving Adjuvant Trastuzumab: Combined Analysis of NCCTG N9831 (Alliance) and NRG Oncology/NSABP B-31. *J Clin Oncol* **37**, 3425-3435 (2019).
44. Bonzano, E., Guenzi, M. & Corvò, R. Cardiotoxicity Assessment After Different Adjuvant Hypofractionated Radiotherapy Concurrently Associated with Trastuzumab in Early Breast Cancer. *In Vivo* **32**, 879-882 (2018).
45. Sayan, M., *et al.* Acute Cardiotoxicity With Concurrent Trastuzumab and Hypofractionated Radiation Therapy in Breast Cancer Patients. *Front Oncol* **9**, 970 (2019).
46. Luttich, L., *et al.* Tyrosine Kinase c-MET as Therapeutic Target for Radiosensitization of Head and Neck Squamous Cell Carcinomas. *Cancers (Basel)* **13**, 1865 (2021).
47. Lolkema, M.P., *et al.* The c-Met Tyrosine Kinase Inhibitor JNJ-38877605 Causes Renal Toxicity through Species-Specific Insoluble Metabolite Formation. *Clin Cancer Res* **21**, 2297-2304 (2015).
48. Nisa, L., *et al.* Targeting the MET Receptor Tyrosine Kinase as a Strategy for Radiosensitization in Locoregionally Advanced Head and Neck Squamous Cell Carcinoma. *Mol Cancer Ther* **19**, 614-626 (2020).
49. Narayan, V., *et al.* Phase 1 Trial of Everolimus and Radiation Therapy for Salvage Treatment of Biochemical Recurrence in Prostate Cancer Patients Following Prostatectomy. *Int J Radiat Oncol Biol Phys* **97**, 355-361 (2017).
50. Gelsomino, F., *et al.* A Dose-finding and Biomarker Evaluation Phase Ib Study of Everolimus in Association With 5-Fluorouracil and Pelvic Radiotherapy as Neoadjuvant Treatment of Locally Advanced Rectal Cancer (E-LARC Study). *Clin Colorectal Cancer* **16**, 410-415.e411 (2017).

51. Chinnaiyan, P., *et al.* A randomized phase II study of everolimus in combination with chemoradiation in newly diagnosed glioblastoma: results of NRG Oncology RTOG 0913. *Neuro Oncol* **20**, 666-673 (2018).
52. Glorieux, M., Dok, R. & Nuyts, S. The influence of PI3K inhibition on the radiotherapy response of head and neck cancer cells. *Sci Rep* **10**, 16208 (2020).
53. Wise-Draper, T.M., *et al.* A Phase Ib Study of the Dual PI3K/mTOR Inhibitor Dactolisib (BEZ235) Combined with Everolimus in Patients with Advanced Solid Malignancies. *Target Oncol* **12**, 323-332 (2017).
54. Rodon, J., *et al.* Phase 1/1b dose escalation and expansion study of BEZ235, a dual PI3K/mTOR inhibitor, in patients with advanced solid tumors including patients with advanced breast cancer. *Cancer Chemother Pharmacol* **82**, 285-298 (2018).
55. Salazar, R., *et al.* Phase II Study of BEZ235 versus Everolimus in Patients with Mammalian Target of Rapamycin Inhibitor-Naive Advanced Pancreatic Neuroendocrine Tumors. *Oncologist* **23**, 766-e790 (2018).
56. Dunn, L.A., *et al.* A Phase 1b Study of Cetuximab and BYL719 (Alpelisib) Concurrent with Intensity Modulated Radiation Therapy in Stage III-IVB Head and Neck Squamous Cell Carcinoma. *Int J Radiat Oncol Biol Phys* **106**, 564-570 (2020).
57. Day, D., *et al.* Phase I trial of alpelisib in combination with concurrent cisplatin-based chemoradiotherapy in patients with locoregionally advanced squamous cell carcinoma of the head and neck. *Oral Oncol* **108**, 104753 (2020).
58. Park, J.H., *et al.* Radiosensitization of the PI3K inhibitor HS-173 through reduction of DNA damage repair in pancreatic cancer. *Oncotarget* **8**, 112893-112906 (2017).
59. Kim, I.A., *et al.* Selective inhibition of Ras, phosphoinositide 3 kinase, and Akt isoforms increases the radiosensitivity of human carcinoma cell lines. *Cancer Res* **65**, 7902-7910 (2005).

60. Brognard, J., Clark, A.S., Ni, Y. & Dennis, P.A. Akt/protein kinase B is constitutively active in non-small cell lung cancer cells and promotes cellular survival and resistance to chemotherapy and radiation. *Cancer Res* **61**, 3986-3997 (2001).
61. Zumsteg, Z.S., *et al.* Taselisib (GDC-0032), a Potent beta-Sparing Small Molecule Inhibitor of PI3K, Radiosensitizes Head and Neck Squamous Carcinomas Containing Activating PIK3CA Alterations. *Clin Cancer Res* **22**, 2009-2019 (2016).
62. McGowan, D.R., *et al.* Buparlisib with thoracic radiotherapy and its effect on tumour hypoxia: A phase I study in patients with advanced non-small cell lung carcinoma. *Eur J Cancer* **113**, 87-95 (2019).
63. Wen, P.Y., *et al.* Phase I, open-label, multicentre study of buparlisib in combination with temozolomide or with concomitant radiation therapy and temozolomide in patients with newly diagnosed glioblastoma. *ESMO Open* **5**, e000673 (2020).
64. Matulonis, U.A., *et al.* Phase I dose escalation study of the PI3kinase pathway inhibitor BKM120 and the oral poly (ADP ribose) polymerase (PARP) inhibitor olaparib for the treatment of high-grade serous ovarian and breast cancer. *Ann Oncol* **28**, 512-518 (2017).
65. Kulinich, D.P., *et al.* Radiotherapy versus combination radiotherapy-bevacizumab for the treatment of recurrent high-grade glioma: a systematic review. *Acta Neurochir (Wien)* **163**, 1921-1934 (2021).
66. Zhao, F., *et al.* Apatinib alone or combined with radiotherapy in metastatic prostate cancer: Results from a pilot, multicenter study. *Oncotarget* **8**, 110774-110784 (2017).
67. Andronesi, O.C., *et al.* Early changes in glioblastoma metabolism measured by MR spectroscopic imaging during combination of anti-angiogenic cediranib and chemoradiation therapy are associated with survival. *NPJ Precis Oncol* **1**, 20 (2017).
68. Batchelor, T.T., *et al.* Improved tumor oxygenation and survival in glioblastoma patients who show increased blood perfusion after cediranib and chemoradiation. *Proc Natl Acad Sci U S A* **110**, 19059-19064 (2013).

69. Formenti, S.C., *et al.* Focal Irradiation and Systemic TGFbeta Blockade in Metastatic Breast Cancer. *Clin Cancer Res* **24**, 2493-2504 (2018).
70. Wick, A., *et al.* Phase 1b/2a study of galunisertib, a small molecule inhibitor of transforming growth factor-beta receptor I, in combination with standard temozolomide-based radiochemotherapy in patients with newly diagnosed malignant glioma. *Invest New Drugs* **38**, 1570-1579 (2020).
71. Bouquet, F., *et al.* TGFbeta1 inhibition increases the radiosensitivity of breast cancer cells in vitro and promotes tumor control by radiation in vivo. *Clin Cancer Res* **17**, 6754-6765 (2011).
72. Hardee, M.E., *et al.* Resistance of glioblastoma-initiating cells to radiation mediated by the tumor microenvironment can be abolished by inhibiting transforming growth factor- $\beta$ . *Cancer Res* **72**, 4119-4129 (2012).
73. Zhang, M., *et al.* Blockade of TGF- $\beta$  signaling by the TGF $\beta$ R-I kinase inhibitor LY2109761 enhances radiation response and prolongs survival in glioblastoma. *Cancer Res* **71**, 7155-7167 (2011).
74. Compter, I., *et al.* Chloroquine combined with concurrent radiotherapy and temozolomide for newly diagnosed glioblastoma: a phase IB trial. *Autophagy*, 1-9 (2020).
75. Rojas-Puentes, L.L., *et al.* Phase II randomized, double-blind, placebo-controlled study of whole-brain irradiation with concomitant chloroquine for brain metastases. *Radiat Oncol* **8**, 209 (2013).
76. Eldredge, H.B., *et al.* Concurrent Whole Brain Radiotherapy and Short-Course Chloroquine in Patients with Brain Metastases: A Pilot Trial. *J Radiat Oncol* **2**, 10.1007/s13566-13013-10111-x (2013).



77. Rosenfeld, M.R., *et al.* A phase I/II trial of hydroxychloroquine in conjunction with radiation therapy and concurrent and adjuvant temozolomide in patients with newly diagnosed glioblastoma multiforme. *Autophagy* **10**, 1359-1368 (2014).
